# Supplementary material for: Rapid, Reproducible, Quantifiable NMR Metabolomics: Methanol and Methanol: Chloroform Precipitation for Removal of Macromolecules in Serum and Whole Blood
Source: PubMed Central journal article supplement (PMC6316042; doi:10.3390/metabo8040093), 2018-12-14
Supplement: metabolites-08-00093-s001.pdf [file metabolites-08-00093-s001.pdf]

## Supplemental Information

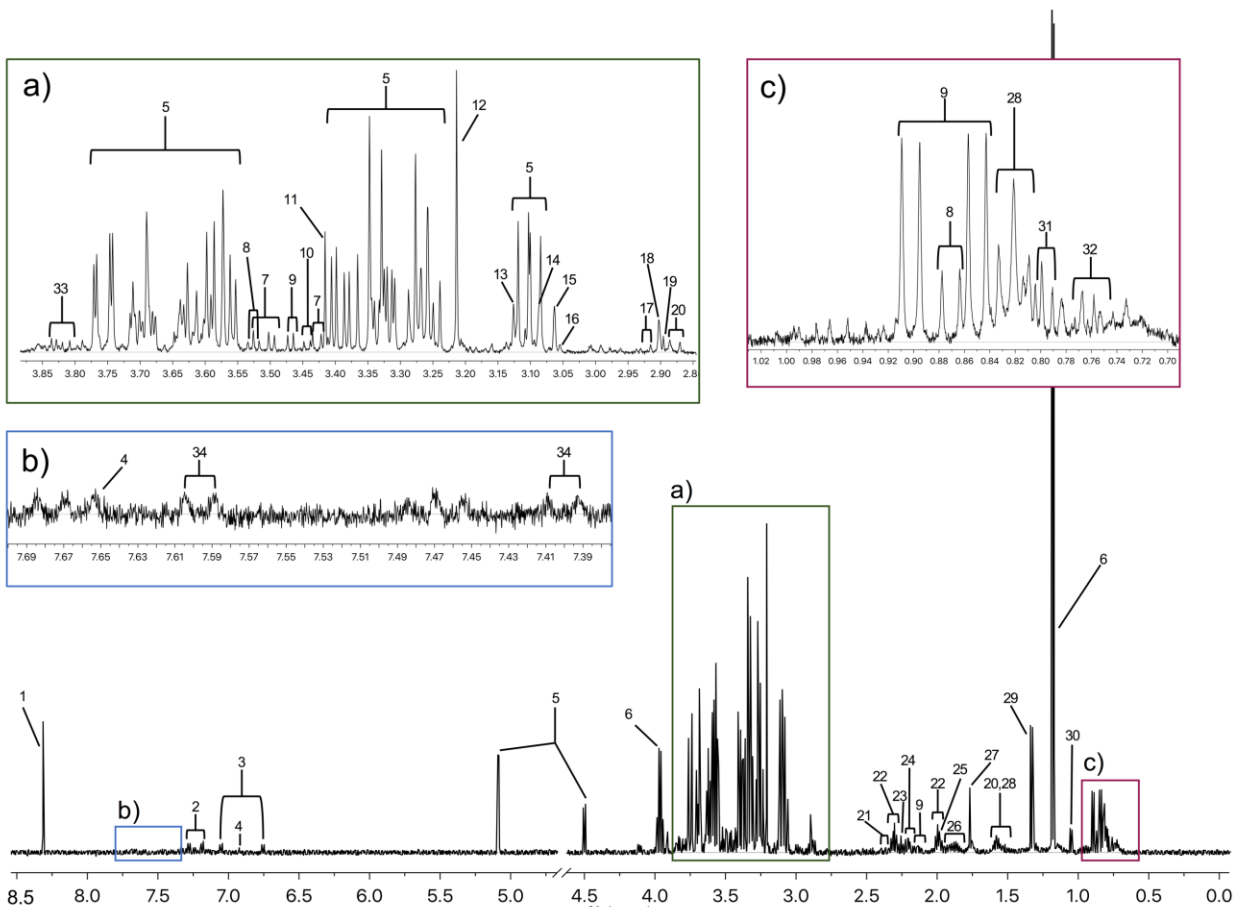

**Figure S1.** Representative annotated spectrum of a pooled normal human serum sample after MeOH ppt + UF. Compounds identified are: 1) formate (internal standard), 2) phenylalanine 3) tyrosine, 4) histidine, 5) glucose, 6) lactate, 7) glycerol, 8) isoleucine, 9) valine, 10) threonine, 11) glycine, 12) methanol, 13) betaine, 14) carnitine, 15) choline, 16) o-acetylcarnitine, 17) ornithine, 18) creatinine, 19) creatine, 20) lysine, 21) citrate, 22) glutamine, 23) succinate, 24) glutamate, 25) methionine, 26) proline, 27) acetate, 28) leucine, 29) alanine, 30) 3-hydroxybutyrate, 31) 2-oxoisocaproate, 32) 2-hydroxybutyrate, 33) serine, 34) tryptophan. KEGG IDs for quantified compounds are provided in Table S1.

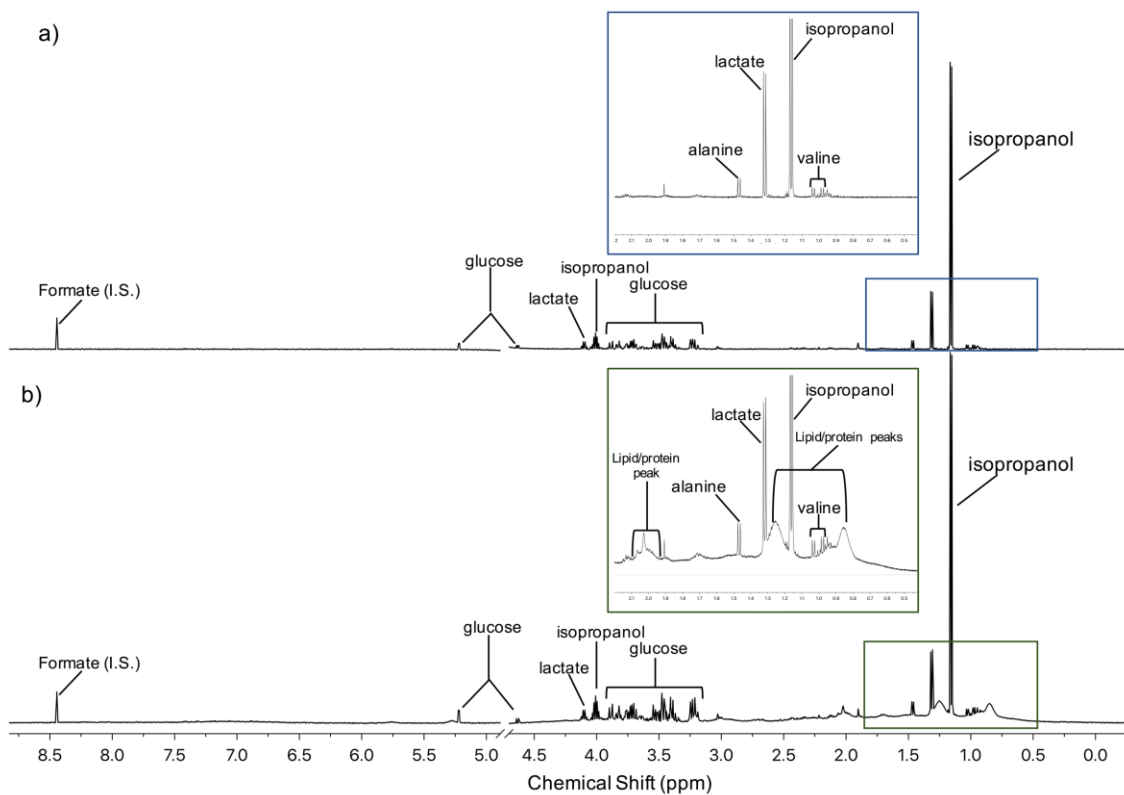

**Figure S2.** The variability in macromolecule removal is evident from representative 1D  $^1\text{H}$ -NMR spectra of technical replicates of pooled normal human serum subjected to ultrafiltration only. (a) Is an example of a clean spectrum that can easily and reliably be quantified, while (b) shows visible macromolecule peaks across the spectrum, and particularly in the lower regions. Formate was added to samples as the internal standard (I.S.) and  $^1\text{H}$ -NMR spectra were acquired on a 500MHz Varian NMR with metnoesy pulse sequence and 32 transients (see text for pulse sequence details).

**Table S1.** Summary of detected and quantified metabolites in healthy pooled human serum subjected to MeOH ppt + UF (n=20), MeOH:CHCl<sub>3</sub>:water ext + UF (n=10), and MeOH ppt only (n=8). P-values were determined by ANOVA with Tukey's post-hoc test (adjusted p-value), performed on normalized data corrected for multiple comparisons.

| Metabolites       | KEGG ID | MeOH ppt + UF |        | MeOH:CHCl <sub>3</sub> :water ext + UF |        | MeOH ppt only |        | MeOH ppt+UF vs. MeOH ppt only | MeOH ppt+UF vs. MeOH:CHCl <sub>3</sub> :water Ext+UF | MeOH ppt only vs. MeOH:CHCl <sub>3</sub> :water Ext+UF |
|-------------------|---------|---------------|--------|----------------------------------------|--------|---------------|--------|-------------------------------|------------------------------------------------------|--------------------------------------------------------|
|                   |         | Median (uM)   | IQR    | Median (uM)                            | IQR    | Median (uM)   | IQR    | Adjusted p-value              | Adjusted p-value                                     | Adjusted p-value                                       |
| 2-Hydroxybutyrate | C05984  | 24.07         | 3.06   | 15.53                                  | 2.75   | 22.34         | 4.08   | 0.78                          | <0.0001                                              | 0.00                                                   |
| 2-Oxoisocaproate  | C00233  | 16.64         | 4.72   | ND                                     |        | 11.73         | 2.05   | 0.28                          |                                                      | 0.0002*                                                |
| 3-Hydroxybutyrate | C01089  | 62.72         | 6.41   | 36.75                                  | 11.16  | 55.04         | 8.13   | 0.19                          | <0.0001                                              | 0.00                                                   |
| Alanine           | C00041  | 364.33        | 28.90  | 331.48                                 | 20.14  | 332.58        | 58.09  | 0.00                          | 0.02                                                 | 0.84                                                   |
| Betaine           | C00719  | 31.75         | 2.76   | 27.90                                  | 2.31   | 30.13         | 7.14   | 0.04                          | 0.00                                                 | 0.90                                                   |
| Carnitine         | C00318  | 25.23         | 1.88   | 18.25                                  | 1.29   | 27.14         | 12.17  | 0.91                          | <0.0001                                              | 0.00                                                   |
| Choline           | C00114  | 39.21         | 2.69   | 34.61                                  | 1.97   | 38.14         | 5.32   | 0.04                          | 0.02                                                 | 1.00                                                   |
| Citrate           | C00158  | 26.93         | 11.39  | 73.29                                  | 25.55  | 29.47         | 8.10   | 0.71                          | <0.0001                                              | 0.00                                                   |
| Creatine          | C00300  | 21.97         | 2.32   | 17.31                                  | 3.96   | 19.96         | 4.68   | 0.02                          | <0.0001                                              | 0.17                                                   |
| Creatinine        | C00791  | 60.39         | 4.32   | 39.82                                  | 7.51   | 55.00         | 8.63   | 0.06                          | <0.0001                                              | 0.01                                                   |
| Glucose           | C00221  | 3603.06       | 307.19 | 3176.94                                | 251.09 | 3302.11       | 580.65 | 0.00                          | 0.02                                                 | 0.62                                                   |
| Glutamate         | C00025  | 170.31        | 15.98  | 110.59                                 | 22.86  | 164.07        | 28.50  | 0.21                          | <0.0001                                              | 0.00                                                   |
| Glutamine         | C00064  | 336.97        | 45.42  | 272.13                                 | 47.44  | 308.31        | 62.22  | 0.01                          | <0.0001                                              | 0.67                                                   |
| Glycerol          | C00116  | 134.89        | 11.12  | 134.91                                 | 19.29  | 127.70        | 20.66  | 0.06                          | 0.16                                                 | 0.88                                                   |
| Glycine           | C00037  | 277.38        | 35.02  | 266.70                                 | 28.27  | 246.10        | 49.93  | 0.00                          | 0.27                                                 | 0.11                                                   |
| Histidine         | C00135  | 37.35         | 14.02  | 26.63                                  | 9.23   | 21.59         | 7.98   | <0.0001                       | 0.01                                                 | 0.20                                                   |
| Isoleucine        | C00407  | 62.84         | 3.81   | 50.44                                  | 8.52   | 57.57         | 8.43   | 0.06                          | <0.0001                                              | 0.11                                                   |
| Lactate           | C00186  | 1999.61       | 145.15 | 1465.28                                | 305.29 | 1832.62       | 323.62 | 0.03                          | <0.0001                                              | 0.09                                                   |
| Leucine           | C00123  | 114.72        | 10.14  | 86.09                                  | 18.70  | 105.90        | 18.18  | 0.08                          | <0.0001                                              | 0.05                                                   |

|                   |        |        |       |        |       |        |       |      |         |       |
|-------------------|--------|--------|-------|--------|-------|--------|-------|------|---------|-------|
| Lysine            | C00047 | 112.46 | 13.13 | 94.74  | 14.33 | 111.04 | 23.07 | 0.08 | <0.0001 | 0.27  |
| Methionine        | C00073 | 22.00  | 4.36  | 20.01  | 4.59  | 19.83  | 3.40  | 0.06 | 0.12    | 0.91  |
| O-Acetylcarnitine | C02571 | 4.93   | 0.92  | 4.82   | 1.88  | 5.09   | 0.90  | 0.80 | 0.96    | 0.70  |
| Ornithine         | C00077 | 46.29  | 6.69  | 41.02  | 6.86  | 45.28  | 10.83 | 0.34 | 0.06    | 0.81  |
| Phenylalanine     | C00079 | 88.82  | 8.16  | 56.96  | 8.46  | 78.77  | 19.31 | 0.07 | <0.0001 | 0.01  |
| Proline           | C00148 | 175.86 | 15.02 | 129.15 | 24.47 | 156.93 | 55.62 | 0.00 | <0.0001 | 0.84  |
| Serine            | C00065 | 133.91 | 16.79 | 105.10 | 29.10 | 114.31 | 37.39 | 0.02 | 0.00    | 0.79  |
| Succinate         | C00042 | 11.18  | 1.80  | 8.77   | 0.96  | 10.04  | 2.95  | 0.22 | 0.25    | 0.98  |
| Threonine         | C00188 | 90.88  | 11.66 | 89.09  | 9.36  | 99.14  | 15.11 | 0.99 | 0.06    | 0.18  |
| Tryptophan        | C00078 | 45.69  | 5.83  |        | ND    | 42.86  | 4.94  | 0.57 |         | 0.06* |
| Tyrosine          | C00082 | 51.34  | 7.96  | 42.66  | 7.60  | 45.69  | 7.71  | 0.05 | 0.00    | 0.84  |
| Valine            | C00183 | 175.92 | 10.93 | 149.64 | 23.46 | 165.90 | 21.80 | 0.02 | <0.0001 | 0.53  |

\* t-test using Holm-Sidak correction for multiple comparisons performed on normalized concentrations of MeOH ppt + UF and MeOH ppt samples.

---

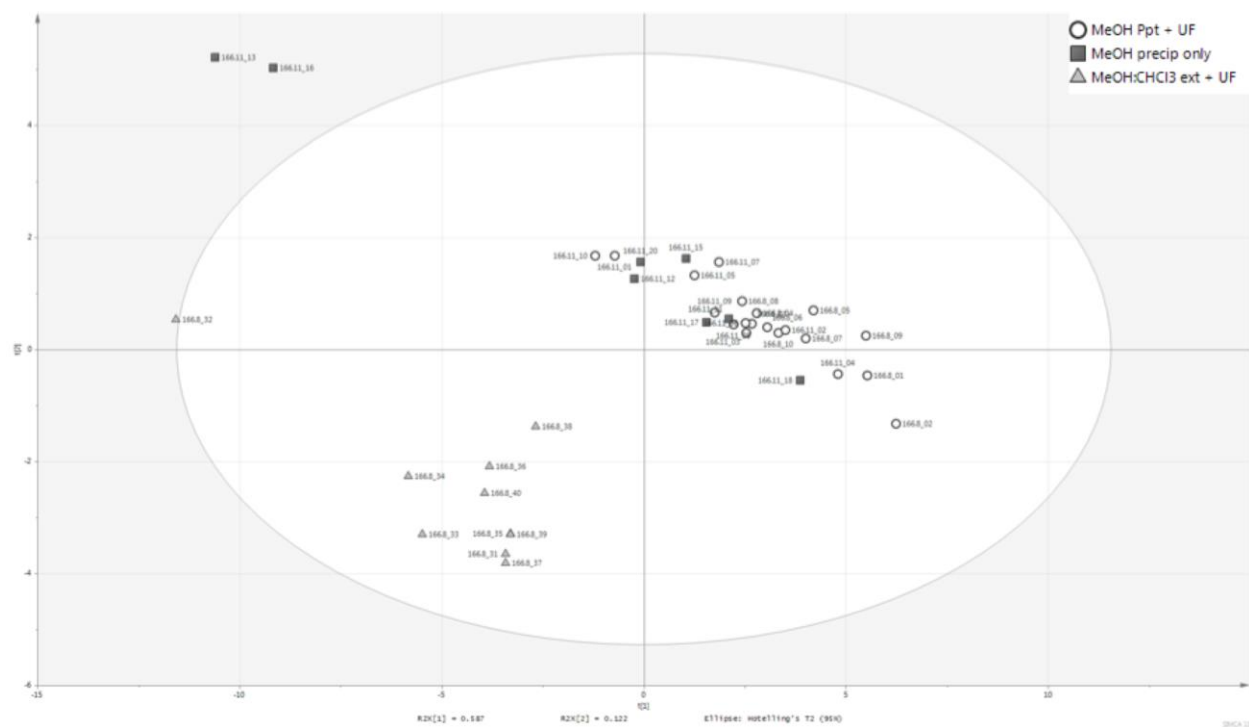

**Figure S3.** Principal component analysis (PCA) plots of technical replicate samples of pooled healthy human serum subjected to MeOH ppt + UF (n=20), MeOH:CHCl<sub>3</sub>:water ext + UF (n=10), and MeOH ppt only (n=8); which shows that MeOH ppt + UF and MeOH are similar, while MeOH:CHCl<sub>3</sub>:water ext + UF samples are distinct. MeOH ppt + UF samples show less variance than MeOH ppt samples or MeOH:CHCl<sub>3</sub>:water ext + UF samples.

**Table S2.** Median metabolite concentrations ( $\mu\text{M}$ ), and interquartile ranges (IQR) of metabolites detected and quantified in technical replicates of pooled serum from sepsis patients ( $n=4$  for MeOH ppt + UF,  $n=5$  for MeOH:CHCl<sub>3</sub>:water ext + UF pooled human serum from sepsis patients). P-values determined by an unpaired Student's t-test, performed on normalized data, corrected for multiple comparisons using Holm-Sidak method (adjusted p-value).

| Metabolite        | KEGG ID | Methanol Precipitated +UF |        | Methanol:chlorform:water extracted+UF |        | adjusted p-value |
|-------------------|---------|---------------------------|--------|---------------------------------------|--------|------------------|
|                   |         | Median ( $\mu\text{M}$ )  | IQR    | Median ( $\mu\text{M}$ )              | IQR    |                  |
| 2-hydroxybutyrate | C05984  | 77.15                     | 5.23   | 74.64                                 | 7.63   | 1.00             |
| 3-Hydroxybutyrate | C01089  | 313.92                    | 10.58  | 327.50                                | 24.50  | 1.00             |
| Alanine           | C00041  | 200.72                    | 9.94   | 208.07                                | 18.95  | 1.00             |
| Betaine           | C00719  | 42.20                     | 2.87   | 43.27                                 | 3.48   | 1.00             |
| Carnitine         | C00318  | 28.89                     | 4.10   | 29.10                                 | 3.95   | 1.00             |
| Choline           | C00114  | 8.86                      | 0.42   | 9.14                                  | 0.99   | 1.00             |
| Citrate           | C00158  | 22.34                     | 0.14   | 53.10                                 | 3.84   | 0.09             |
| Creatine          | C00300  | 68.33                     | 5.78   | 74.60                                 | 9.91   | 1.00             |
| Creatinine        | C00791  | 101.82                    | 4.81   | 100.84                                | 8.89   | 1.00             |
| Glucose           | C00221  | 4900.77                   | 292.41 | 4996.33                               | 200.17 | 1.00             |
| Glutamate         | C00025  | 57.92                     | 10.65  | 51.77                                 | 11.26  | 1.00             |
| Glutamine         | C00064  | 295.55                    | 11.33  | 311.90                                | 23.54  | 0.99             |
| Glycine           | C00037  | 118.69                    | 8.37   | 128.06                                | 9.02   | 0.83             |
| Histidine         | C00135  | 22.10                     | 5.19   | 24.35                                 | 3.17   | 1.00             |
| Isoleucine        | C00407  | 37.97                     | 3.84   | 34.95                                 | 2.81   | 0.98             |
| Lactate           | C00186  | 1660.08                   | 41.33  | 1812.24                               | 60.94  | 0.80             |
| Leucine           | C00123  | 66.40                     | 6.33   | 73.62                                 | 6.34   | 1.00             |
| Lysine            | C00047  | 78.99                     | 3.25   | 78.44                                 | 10.19  | 1.00             |
| Methionine        | C00073  | 19.05                     | 3.42   | 17.32                                 | 0.60   | 0.95             |
| O-Acetylcarnitine | C02571  | 10.64                     | 0.81   | 11.67                                 | 3.17   | 1.00             |
| Ornithine         | C00077  | 38.51                     | 1.17   | 38.89                                 | 7.44   | 1.00             |
| Phenylalanine     | C00079  | 68.88                     | 5.03   | 63.12                                 | 10.51  | 1.00             |
| Proline           | C00148  | 109.71                    | 17.86  | 109.78                                | 14.02  | 1.00             |
| Pyruvate          | C00022  | 66.93                     | 5.21   | 37.10                                 | 7.72   | 0.01             |
| Threonine         | C00188  | 51.63                     | 4.16   | 48.49                                 | 14.82  | 1.00             |
| Tyrosine          | C00082  | 45.82                     | 2.95   | 48.75                                 | 3.36   | 1.00             |
| Valine            | C00183  | 116.33                    | 8.89   | 121.22                                | 11.24  | 1.00             |

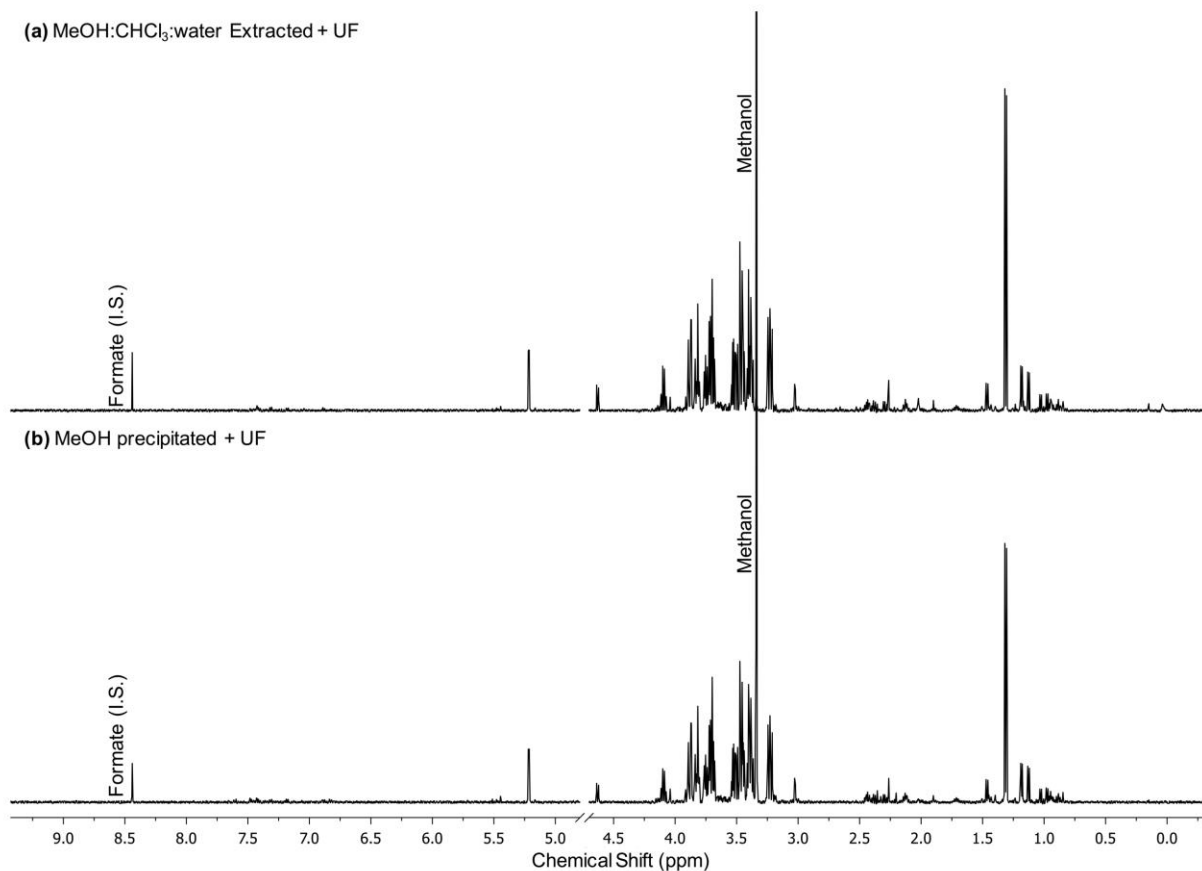

**Figure S4.** Representative 1D  $^1\text{H}$ -NMR spectra of technical replicates of pooled human serum from patients with sepsis subjected to either (a) MeOH:CHCl<sub>3</sub>:water extraction followed by ultrafiltration (+UF) or (b) MeOH precipitation + UF. Formate was added to samples as the internal standard (I.S.) and  $^1\text{H}$ -NMR spectra were acquired on a 500MHz Varian NMR with metnoesy pulse sequence and 32 transients (see text for pulse sequence details). Phase shift correction, excision of the water peak, and baseline correction were performed before identification and quantification of metabolites (see text for details).

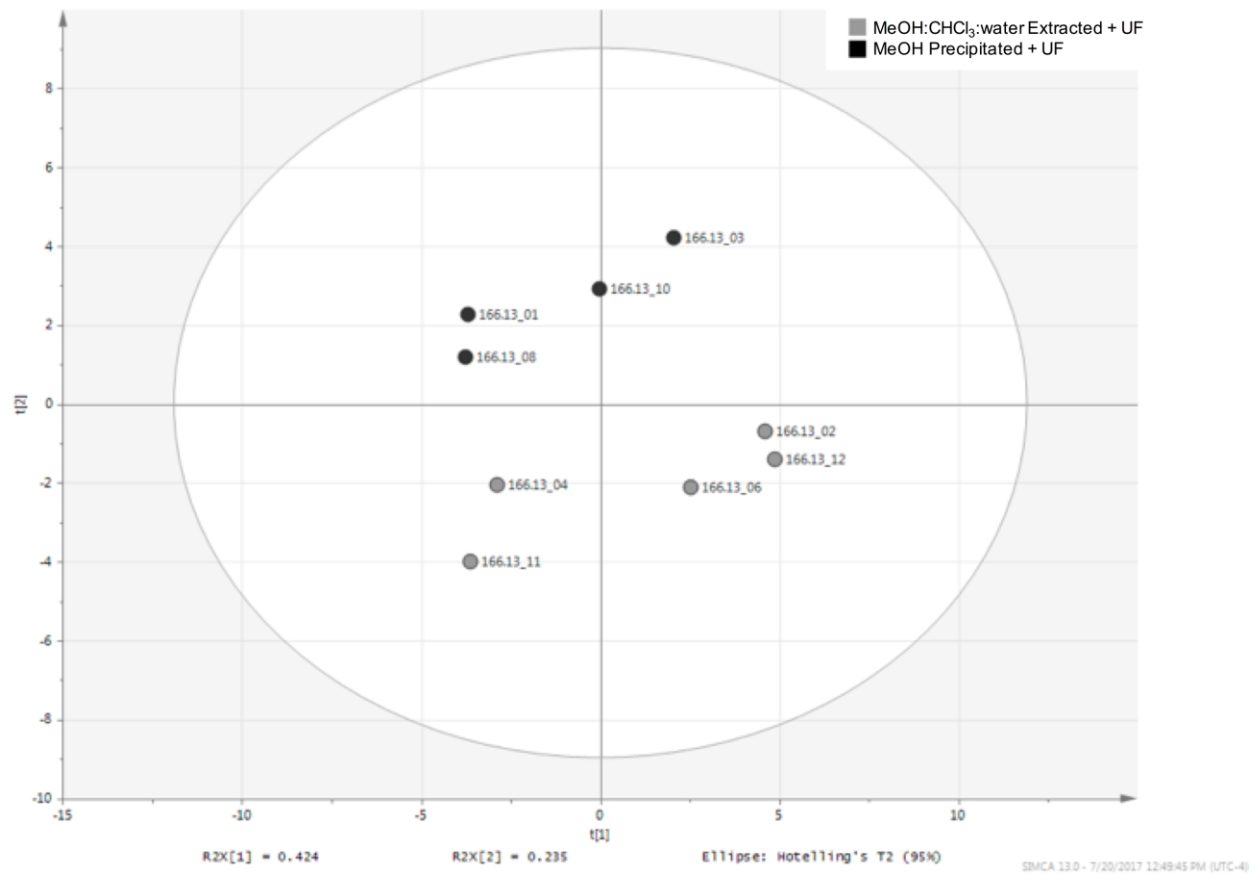

**Figure S5.** Principal component analysis (PCA) plots of technical replicate samples of serum from patients with sepsis subjected to MeOH ppt + UF (n=4) and MeOH:CHCl<sub>3</sub>:water ext + UF (n=5), which shows that MeOH ppt + UF samples are distinct from MeOH:CHCl<sub>3</sub>:water extraction + UF.



**Table S3.** Median metabolite concentrations ( $\mu\text{M}$ ), and interquartile ranges (IQR) of metabolites detected and quantified in normal human serum after short term storage (<8 months) and long term (3-4 years) storage at  $-80^{\circ}\text{C}$  ( $n=8$  for both groups). P-values were determined by an unpaired Student's t-test, performed on normalized data corrected for multiple comparisons using Holm-Sidak method (adjusted p-value).

| Metabolite        | KEGG ID | Short term Storage at $-80^{\circ}\text{C}$ |        | Long term Storage at $-80^{\circ}\text{C}$ |        | adjusted p-value |
|-------------------|---------|---------------------------------------------|--------|--------------------------------------------|--------|------------------|
|                   |         | Median ( $\mu\text{M}$ )                    | IQR    | Median ( $\mu\text{M}$ )                   | IQR    |                  |
| 3-Hydroxybutyrate | C01089  | 28.89                                       | 42.40  | 26.99                                      | 25.18  | 1.00             |
| Alanine           | C00041  | 186.50                                      | 56.26  | 173.11                                     | 56.12  | 1.00             |
| Betaine           | C00719  | 20.57                                       | 5.07   | 19.98                                      | 6.90   | 1.00             |
| Carnitine         | C00318  | 15.42                                       | 7.97   | 12.33                                      | 6.03   | 0.68             |
| Choline           | C00114  | 3.75                                        | 2.03   | 4.09                                       | 1.68   | 1.00             |
| Citrate           | C00158  | 55.76                                       | 14.50  | 50.79                                      | 8.96   | 1.00             |
| Creatine          | C00300  | 14.52                                       | 12.98  | 15.57                                      | 9.08   | 1.00             |
| Creatinine        | C00791  | 29.12                                       | 6.41   | 25.24                                      | 3.83   | 1.00             |
| Glucose           | C00221  | 2333.39                                     | 266.42 | 2319.15                                    | 93.48  | 1.00             |
| Glutamate         | C00025  | 34.54                                       | 18.24  | 46.63                                      | 12.99  | 1.00             |
| Glutamine         | C00064  | 298.40                                      | 33.47  | 286.18                                     | 24.70  | 1.00             |
| Glycine           | C00037  | 116.68                                      | 11.51  | 98.51                                      | 31.47  | 1.00             |
| Histidine         | C00135  | 19.10                                       | 12.71  | 30.34                                      | 2.89   | 0.49             |
| Isoleucine        | C00407  | 26.88                                       | 7.12   | 29.38                                      | 7.03   | 1.00             |
| Lactate           | C00186  | 758.11                                      | 341.37 | 654.79                                     | 419.17 | 0.97             |
| Leucine           | C00123  | 53.48                                       | 15.18  | 53.46                                      | 12.97  | 1.00             |
| Lysine            | C00047  | 74.43                                       | 14.62  | 70.86                                      | 12.13  | 1.00             |
| Methionine        | C00073  | 15.29                                       | 3.63   | 18.19                                      | 6.44   | 1.00             |
| O-Acetylcarnitine | C02571  | 4.82                                        | 1.39   | 4.68                                       | 0.97   | 1.00             |
| Ornithine         | C00077  | 23.78                                       | 7.25   | 29.01                                      | 2.24   | 1.00             |
| Phenylalanine     | C00079  | 35.94                                       | 3.78   | 31.20                                      | 2.30   | 0.59             |
| Proline           | C00148  | 95.14                                       | 33.09  | 106.11                                     | 41.16  | 1.00             |
| Propylene glycol  | C00583  | 20.07                                       | 10.83  | 21.95                                      | 9.96   | 1.00             |
| Serine            | C00065  | 45.21                                       | 8.92   | 62.43                                      | 13.42  | 1.00             |
| Threonine         | C00188  | 47.30                                       | 8.83   | 53.47                                      | 11.38  | 1.00             |
| Tryptophan        | C00078  | 22.43                                       | 3.03   | ND                                         |        |                  |
| Tyrosine          | C00082  | 32.46                                       | 4.93   | 32.94                                      | 5.83   | 1.00             |
| Valine            | C00183  | 102.69                                      | 38.53  | 91.66                                      | 27.48  | 1.00             |

**Table S4.** Median metabolite concentrations (uM) and interquartile ranges (IQR) of metabolites detected and quantified in technical replicates of pooled healthy pig whole blood (n=10 for MeOH:CHCl<sub>3</sub> precipitated samples, n=10 for MeOH:CHCl<sub>3</sub>:water extracted samples). P-values were determined by an unpaired Student's t-test performed on normalized data corrected for multiple comparisons using Holm-Sidak method (adjusted p-value).

| Metabolite       | KEGG ID | MeOH:CHCl <sub>3</sub> Precipitated |        | Methanol:chlorform:water extracted |        | adjusted p-value |
|------------------|---------|-------------------------------------|--------|------------------------------------|--------|------------------|
|                  |         | Median (uM)                         | IQR    | Median (uM)                        | IQR    |                  |
| 2-Oxoisocaproate | C00233  | 22.03                               | 4.57   | 22.73                              | 2.67   | 0.98             |
| ADP              | C00008  | 117.98                              | 14.68  | 93.83                              | 22.83  | 0.24             |
| AMP              | C00020  | 112.20                              | 16.02  | 91.53                              | 12.11  | 0.07             |
| ATP              | C00002  | 92.91                               | 23.10  | 59.78                              | 24.14  | 0.06             |
| Alanine          | C00041  | 312.17                              | 37.50  | 281.62                             | 29.87  | 0.27             |
| Betaine          | C00719  | 151.87                              | 20.61  | 134.95                             | 12.64  | 0.07             |
| Choline          | C00114  | 47.66                               | 5.30   | 42.22                              | 5.30   | 0.17             |
| Creatine         | C00300  | 181.09                              | 28.75  | 168.26                             | 17.45  | 0.62             |
| Creatinine       | C00791  | 64.89                               | 6.50   | 65.06                              | 4.86   | 0.98             |
| Glucose          | C00221  | 472.44                              | 61.12  | 594.80                             | 98.58  | 0.03             |
| Glutamate        | C00025  | 228.22                              | 18.22  | 214.89                             | 26.26  | 0.21             |
| Glutamine        | C00064  | 187.45                              | 16.93  | 171.72                             | 21.54  | 0.26             |
| Glutathione      | C00051  | 136.96                              | 21.18  | 122.92                             | 13.78  | 0.80             |
| Glycine          | C00037  | 645.39                              | 65.16  | 606.51                             | 69.02  | 0.70             |
| Histidine        | C00135  | 77.78                               | 6.65   | 93.85                              | 8.78   | 0.01             |
| Hypoxanthine     | C00262  | 138.42                              | 9.20   | 187.39                             | 42.72  | 0.00             |
| IMP              | C00130  | 94.95                               | 14.47  | 89.90                              | 12.06  | 0.87             |
| Isoleucine       | C00407  | 80.02                               | 15.25  | 71.70                              | 10.86  | 0.86             |
| Lactate          | C00186  | 5950.97                             | 636.86 | 5221.06                            | 502.94 | 0.10             |
| Leucine          | C00123  | 151.40                              | 23.21  | 147.03                             | 18.63  | 0.95             |
| Lysine           | C00047  | 269.23                              | 43.59  | 225.97                             | 8.67   | 0.03             |
| Malonate         | C00383  | 163.71                              | 15.04  | 138.60                             | 13.34  | 0.02             |
| Methionine       | C00073  | 33.10                               | 5.29   | 30.55                              | 3.26   | 0.95             |
| Ornithine        | C00077  | 126.23                              | 17.68  | 112.11                             | 4.52   | 0.05             |
| Phenylalanine    | C00079  | 59.19                               | 3.76   | 62.93                              | 6.33   | 0.74             |
| Proline          | C00148  | 260.61                              | 53.53  | 249.50                             | 30.76  | 0.80             |
| Pyruvate         | C00022  | 296.65                              | 41.46  | 157.24                             | 63.81  | 0.00             |
| Serine           | C00065  | 110.96                              | 5.66   | 97.40                              | 18.08  | 0.47             |
| Succinate        | C00042  | 16.52                               | 1.73   | 15.14                              | 2.87   | 0.95             |
| Taurine          | C00245  | 206.57                              | 56.23  | 201.65                             | 34.14  | 0.87             |
| Threonine        | C00188  | 129.63                              | 20.48  | 123.16                             | 18.64  | 0.98             |

|                        |        |        |       |        |       |      |
|------------------------|--------|--------|-------|--------|-------|------|
| Trimethylamine N-oxide | C01104 | 22.14  | 2.52  | 27.46  | 3.12  | 0.00 |
| Tryptophan             | C00078 | 33.16  | 5.24  | 38.97  | 9.69  | 0.55 |
| Tyrosine               | C00082 | 73.48  | 12.19 | 73.09  | 7.26  | 0.98 |
| Valine                 | C00183 | 203.05 | 25.92 | 189.09 | 24.36 | 0.80 |

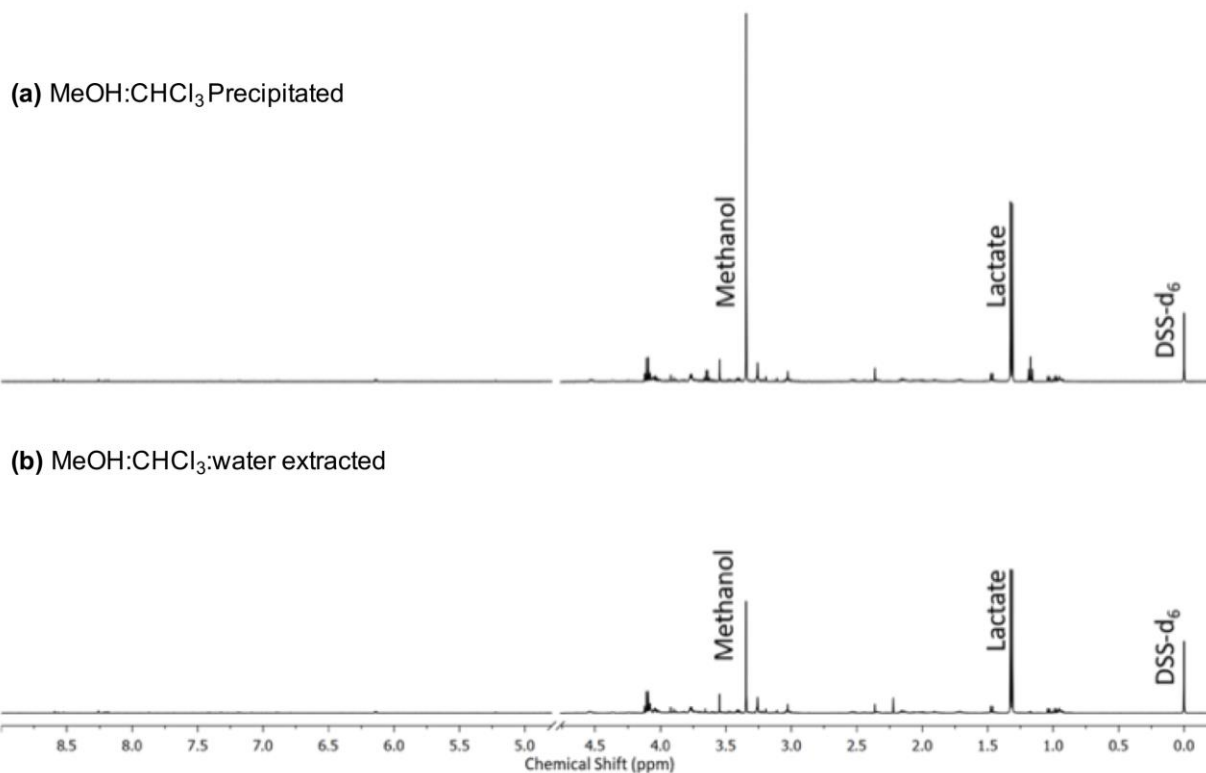

**Figure S6.** Representative 1D <sup>1</sup>H-NMR spectra of technical replicate samples of pooled healthy pig whole blood (WB) subjected to **a** MeOH:CHCl<sub>3</sub> precipitation, and **b** MeOH:CHCl<sub>3</sub>:water extraction. <sup>1</sup>H-NMR were acquired on a 500MHz Varian NMR with metnoesy pulse sequence and 32 transients (see text for pulse sequence details). Phase shift correction, water peak excision, and baseline correction were performed before identification and quantification of metabolites (see text for details).

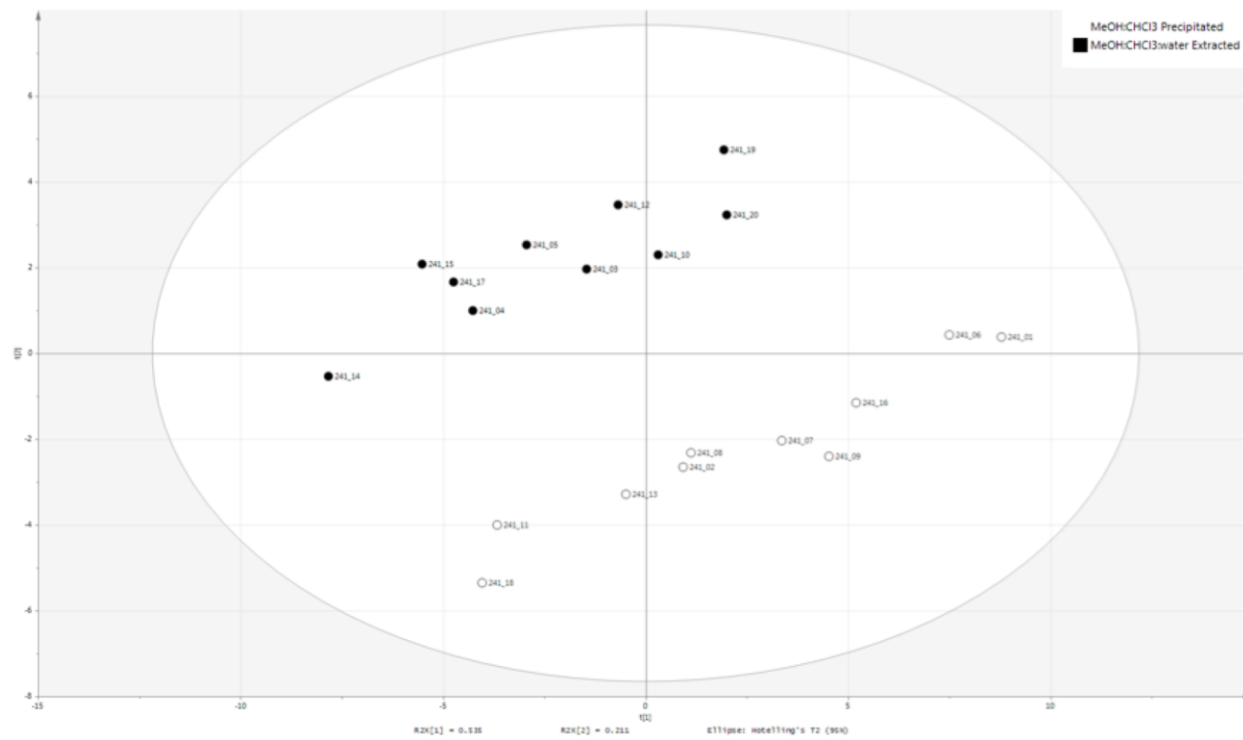

**Figure S7.** Principal component analysis (PCA) plots of technical replicates of pooled healthy pig whole blood (WB) which shows that MeOH:CHCl<sub>3</sub> precipitation (n=10) and MeOH:CHCl<sub>3</sub>:water extraction (n=10) are distinct from each other, and have similar variance.

**Table S5.** Median metabolite concentrations ( $\mu\text{M}$ ), interquartile ranges (IQRs), and results of two-way ANOVA comparing normalized concentration values in detected and quantified metabolites acquired from MeOH:CHCl<sub>3</sub> precipitated (n=4), MeOH:CHCl<sub>3</sub>:water ext  $\pm$ UF (n=10), and abbreviated MeOH:CHCl<sub>3</sub>:water ext (n=4) of pooled baboon whole blood (WB) samples. Multiple comparisons were done using Tukey's post-hoc test (adjusted p-value).

| Metabolite             | KEGG ID | MeOH:CHCl <sub>3</sub> ppt |       | MeOH:CHCl <sub>3</sub> :water ext + UF |        | Abbreviated MeOH:CHCl <sub>3</sub> :water ext |        | MeOH:CHCl <sub>3</sub> :water Ext+UF vs MeOH:CHCl <sub>3</sub> ppt | MeOH:CHCl <sub>3</sub> :water Ext+UF vs Abbreviated MeOH:CHCl <sub>3</sub> :water Ext | Abbreviated MeOH:CHCl <sub>3</sub> :water Ext vs MeOH:CHCl <sub>3</sub> ppt |
|------------------------|---------|----------------------------|-------|----------------------------------------|--------|-----------------------------------------------|--------|--------------------------------------------------------------------|---------------------------------------------------------------------------------------|-----------------------------------------------------------------------------|
|                        |         | Median ( $\mu\text{M}$ )   | IQR   | Median ( $\mu\text{M}$ )               | IQR    | Median ( $\mu\text{M}$ )                      | IQR    | adjusted p-value                                                   | adjusted p-value                                                                      | adjusted p-value                                                            |
| 2-Oxoisoaproate        | C00233  | 10.82                      | 1.22  | 17.50                                  | 3.53   | 10.82                                         | 3.22   | 0.35                                                               | 0.46                                                                                  | 1.00                                                                        |
| 3-hydroxybutyrate      | C01089  | 41.96                      | 6.71  | 68.82                                  | 21.18  | 49.11                                         | 6.07   | 0.01                                                               | 0.03                                                                                  | 0.98                                                                        |
| 3-Hydroxyisobutyrate   | C01188  | 14.02                      | 3.40  | 23.87                                  | 5.61   | 15.28                                         | 3.14   | 0.12                                                               | 0.01                                                                                  | 0.64                                                                        |
| 3-Methyl-2-oxovalerate | C03465  | 12.35                      | 0.82  | 18.01                                  | 2.01   | 14.03                                         | 2.42   | 0.68                                                               | 0.83                                                                                  | 0.98                                                                        |
| ADP                    | C00008  | 71.43                      | 9.65  | 41.35                                  | 16.49  | 47.91                                         | 7.48   | 0.00                                                               | 0.72                                                                                  | 0.03                                                                        |
| Alanine                | C00041  | 123.96                     | 8.14  | 198.42                                 | 24.27  | 137.56                                        | 25.86  | <0.0001                                                            | 0.00                                                                                  | 1.00                                                                        |
| AMP                    | C00020  | 153.40                     | 2.16  | 170.50                                 | 24.93  | 128.38                                        | 38.91  | 0.73                                                               | 0.02                                                                                  | 0.16                                                                        |
| Arginine               | C00062  | 237.29                     | 36.19 | 523.08                                 | 127.33 | 328.00                                        | 48.78  | <0.0001                                                            | <0.0001                                                                               | 0.32                                                                        |
| Aspartate              | C00049  | 60.00                      | 7.77  | 92.77                                  | 18.98  | 51.74                                         | 13.79  | 0.00                                                               | 0.00                                                                                  | 0.80                                                                        |
| ATP                    | C00002  | 70.10                      | 3.71  | 117.67                                 | 30.30  | 58.01                                         | 38.99  | 0.00                                                               | <0.0001                                                                               | 0.33                                                                        |
| Betaine                | C00719  | 47.71                      | 1.55  | 73.92                                  | 8.25   | 51.56                                         | 9.92   | 0.01                                                               | 0.05                                                                                  | 0.95                                                                        |
| Choline                | C00114  | 10.72                      | 0.42  | 17.40                                  | 5.10   | 10.27                                         | 3.52   | 0.14                                                               | 0.15                                                                                  | 0.99                                                                        |
| Creatine               | C00300  | 43.92                      | 0.77  | 70.40                                  | 13.45  | 46.43                                         | 11.06  | 0.02                                                               | 0.03                                                                                  | 1.00                                                                        |
| Creatinine             | C00791  | 21.24                      | 0.19  | 49.65                                  | 6.02   | 32.18                                         | 8.95   | <0.0001                                                            | 0.02                                                                                  | 0.45                                                                        |
| Glucose                | C00221  | 2227.63                    | 94.64 | 4090.37                                | 609.89 | 2304.12                                       | 606.69 | <0.0001                                                            | <0.0001                                                                               | 0.79                                                                        |
| Glutamate              | C00025  | 246.33                     | 13.05 | 424.13                                 | 56.19  | 256.04                                        | 62.21  | <0.0001                                                            | <0.0001                                                                               | 0.95                                                                        |
| Glutamine              | C00064  | 231.24                     | 19.48 | 360.43                                 | 55.19  | 220.62                                        | 59.21  | <0.0001                                                            | <0.0001                                                                               | 0.82                                                                        |
| Glutathione            | C00051  | 184.27                     | 14.87 | 312.99                                 | 30.36  | 243.80                                        | 32.90  | <0.0001                                                            | 0.01                                                                                  | 0.28                                                                        |

|                        |        |         |        |         |        |         |        |         |         |      |
|------------------------|--------|---------|--------|---------|--------|---------|--------|---------|---------|------|
| Glycine                | C00037 | 268.54  | 10.00  | 362.80  | 64.13  | 269.63  | 59.15  | 0.00    | 0.00    | 0.86 |
| Histidine              | C00135 | 36.80   | 3.80   | 65.52   | 13.30  | 45.95   | 12.80  | 0.00    | 0.02    | 0.90 |
| IMP                    | C00130 | 36.91   | 2.41   | 49.80   | 12.67  | 37.44   | 17.05  | 0.18    | 0.11    | 0.95 |
| Isoleucine             | C00407 | 37.22   | 2.23   | 62.70   | 13.76  | 42.11   | 9.57   | 0.00    | 0.02    | 0.95 |
| Lactate                | C00186 | 2260.21 | 167.98 | 3744.56 | 467.26 | 2072.07 | 593.70 | <0.0001 | <0.0001 | 0.03 |
| Leucine                | C00123 | 63.92   | 4.89   | 100.06  | 15.47  | 57.36   | 24.37  | 0.00    | 0.00    | 0.82 |
| Lysine                 | C00047 | 154.85  | 13.40  | 247.35  | 11.55  | 163.03  | 41.27  | <0.0001 | <0.0001 | 1.00 |
| Malonate               | C00383 | 112.06  | 6.80   | 188.35  | 13.93  | 136.64  | 26.44  | <0.0001 | 0.00    | 0.70 |
| O-Acetylcarnitine      | C02571 | 11.96   | 0.72   | 22.39   | 2.56   | 14.13   | 2.03   | 0.04    | 0.08    | 0.99 |
| Phenylalanine          | C00079 | 31.44   | 7.26   | 61.01   | 14.67  | 35.53   | 14.21  | 0.00    | 0.01    | 0.93 |
| Proline                | C00148 | 95.67   | 0.77   | 108.31  | 17.25  | 81.22   | 23.35  | 0.90    | 0.00    | 0.03 |
| Pyruvate               | C00022 | 75.83   | 8.23   | 85.20   | 25.97  | 72.51   | 18.16  | 0.60    | 0.46    | 0.96 |
| Serine                 | C00065 | 95.26   | 3.30   | 127.06  | 14.89  | 66.00   | 15.39  | 0.09    | <0.0001 | 0.03 |
| Taurine                | C00245 | 147.84  | 17.85  | 271.64  | 59.03  | 161.43  | 26.31  | <0.0001 | <0.0001 | 0.86 |
| Trimethylamine N-oxide | C01104 | 27.73   | 5.46   | 74.46   | 13.20  | 40.40   | 5.79   | <0.0001 | 0.00    | 0.31 |
| Tyrosine               | C00082 | 31.46   | 3.51   | 57.45   | 14.61  | 38.38   | 7.96   | 0.00    | 0.05    | 0.82 |
| Valine                 | C00183 | 91.03   | 8.06   | 167.95  | 46.54  | 98.55   | 25.40  | <0.0001 | <0.0001 | 0.97 |

---

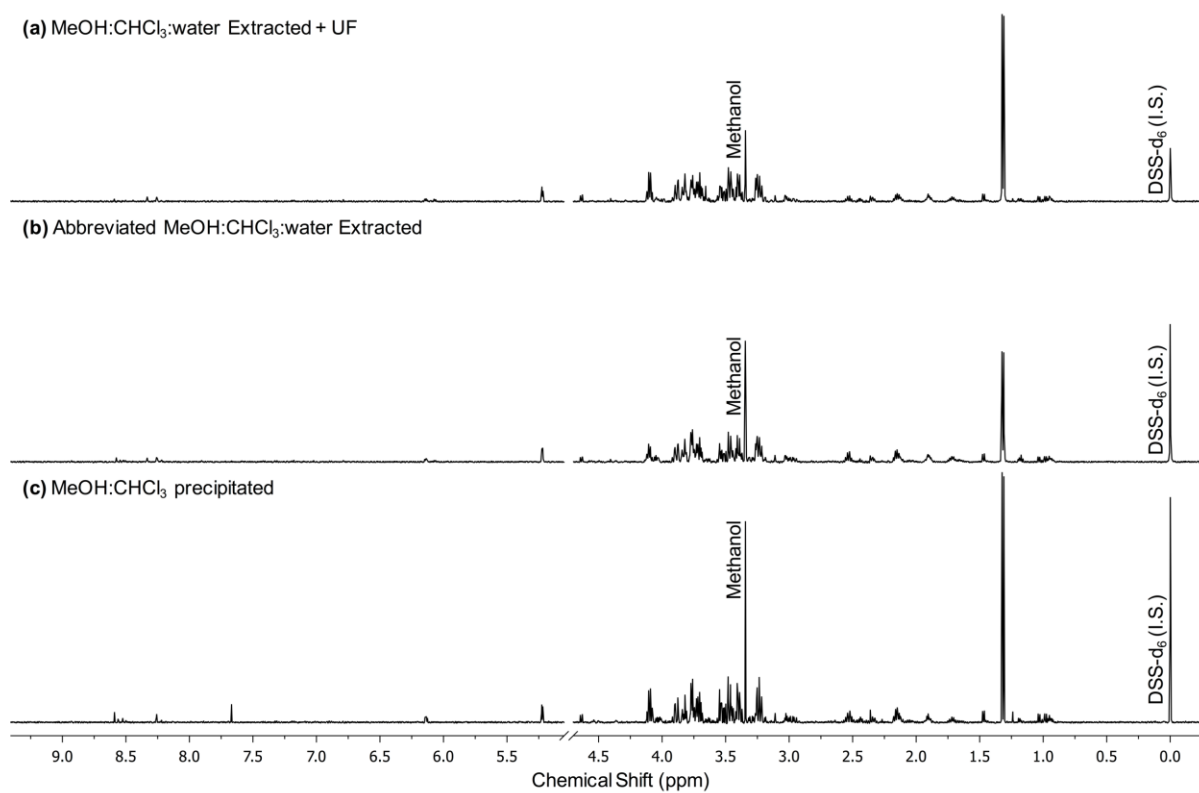

**Figure S8.** Representative 1D <sup>1</sup>H-NMR spectra of technical replicate samples of pooled baboon whole blood (WB) subjected to (a) MeOH:CHCl<sub>3</sub>:water extraction followed by ultrafiltration (+ UF), (b) MeOH:CHCl<sub>3</sub> precipitation, or (c) abbreviated MeOH:CHCl<sub>3</sub>:water extraction. 1D <sup>1</sup>H-NMR were acquired on a 500MHz Varian NMR with metnoesy pulse sequence and 32 transients. Phase shift correction, water peak excision, and baseline correction were performed before identification and quantification of metabolites (see text for details).

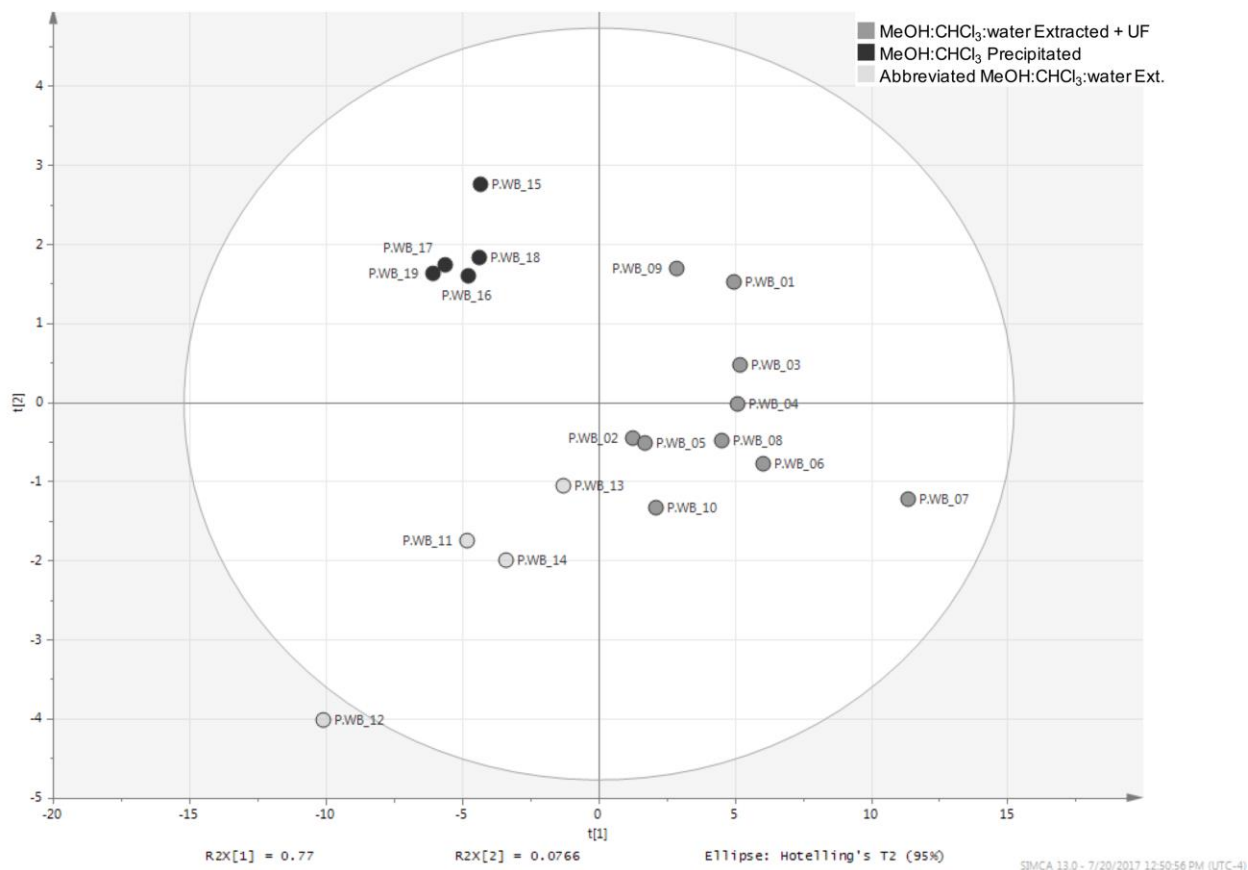

**Figure S9.** Principal component analysis (PCA) plots of technical replicates of pooled baboon whole blood (WB) which shows that variance is less when MeOH:CHCl<sub>3</sub> precipitation is used compared to MeOH:CHCl<sub>3</sub>:water extracted followed by ultrafiltration (+UF) or abbreviated MeOH:CHCl<sub>3</sub>:water extracted samples.

#### S4.4 Methanol:chloroform:water extractions – detailed procedure

From each sample, 500  $\mu$ L was transferred to a glass vial and extracted with MeOH:CHCl<sub>3</sub> (2 mL, 1:1 v/v), vortexed, then centrifuged (1300g, 4°C for 20 min). Supernatants were transferred to a second vial, and the pellet was extracted with MeOH:CHCl<sub>3</sub> (1 mL), vortexed, and centrifuged (1300g, 4°C for 20 min). Supernatants from each extraction step were combined in a glass vial. Pellets were resuspended in 1mL deionized water. Supernatants were washed with 1mL water, vortexed, and chilled (4°C for 18 min). The upper (aqueous) layer was added to the pellet, vortexed, and centrifuged (1300g, 4°C for 20 min); the lower (organic) layer was dried by speed vacuum (50°C) for later analysis. The supernatant was removed from the pellet into a round-bottom flask (50-mL) and the pellet was washed with water (1 mL), vortexed, and centrifuged (1300g, 4°C for 20 min). This supernatant was added to round-bottom flask, and combined supernatants containing the aqueous metabolites were diluted with DI water (2 mL) and dried by lyophilization for no more than 24 hours.
